# Supplementary material for: Selective CO2 adsorption and bathochromic shift in a phosphocholine-based lipid and conjugated polymer assembly
Source: Royal Society of Chemistry journal article supplement (doi:10.1039/d2ra00453d), 2022-01-01
Supplement: d2ra00453d1.pdf [file d2ra00453d1.pdf]

## Supporting Information

### Selective CO<sub>2</sub> Adsorption and Bathochromic Shift in a Phosphocholine-Based Lipid Bilayer Structure Assembled with a Crystalline Conjugated Polymer

Juran Noh,<sup>a</sup> Dong Geon Koo,<sup>b</sup> Chohee Hyun,<sup>c</sup> Dabin Lee,<sup>b</sup> Seohyeon Jang,<sup>b</sup> Jiho Kim,<sup>e</sup> Yejee Jeon,<sup>b</sup> Su-Young Moon,<sup>d</sup> Boknam Chae,<sup>e</sup> Inho Nam,<sup>b</sup> Tae Joo Shin<sup>\*c</sup> and Juhyun Park<sup>\*b</sup>

<sup>a</sup> Department of Material Science and Engineering, Texas A&M University, College Station, TX 77843, USA.

<sup>b</sup> Department of Intelligent Energy and Industry, School of Chemical Engineering and Materials Science, Chung-Ang University, Seoul 06974, Republic of Korea.

<sup>c</sup> UNIST Central Research Facilities and School of Natural Science, Ulsan National Institute of and Technology (UNIST), Ulsan 44919, Republic of Korea.

<sup>d</sup> C1 Gas & Carbon Convergent Research Center, Chemical & Process Technology, Korea Research Institute of Chemical Technology, Daejeon 34114, Republic of Korea

<sup>e</sup> Pohang Accelerator Laboratory, 80 Jigok-ro, Nam-gu, Pohang, Gyeongbuk, 37673, Republic of Korea

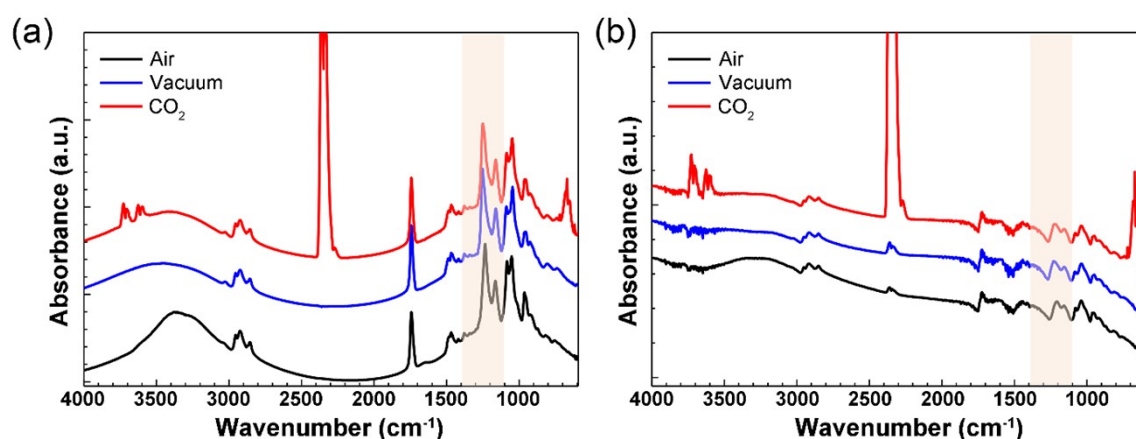

Figure S1. FT-IR absorbance spectra of (a) D7PC and (b) D7PC/P3HT film in air (black), vacuum (blue) and CO<sub>2</sub> (red) condition.

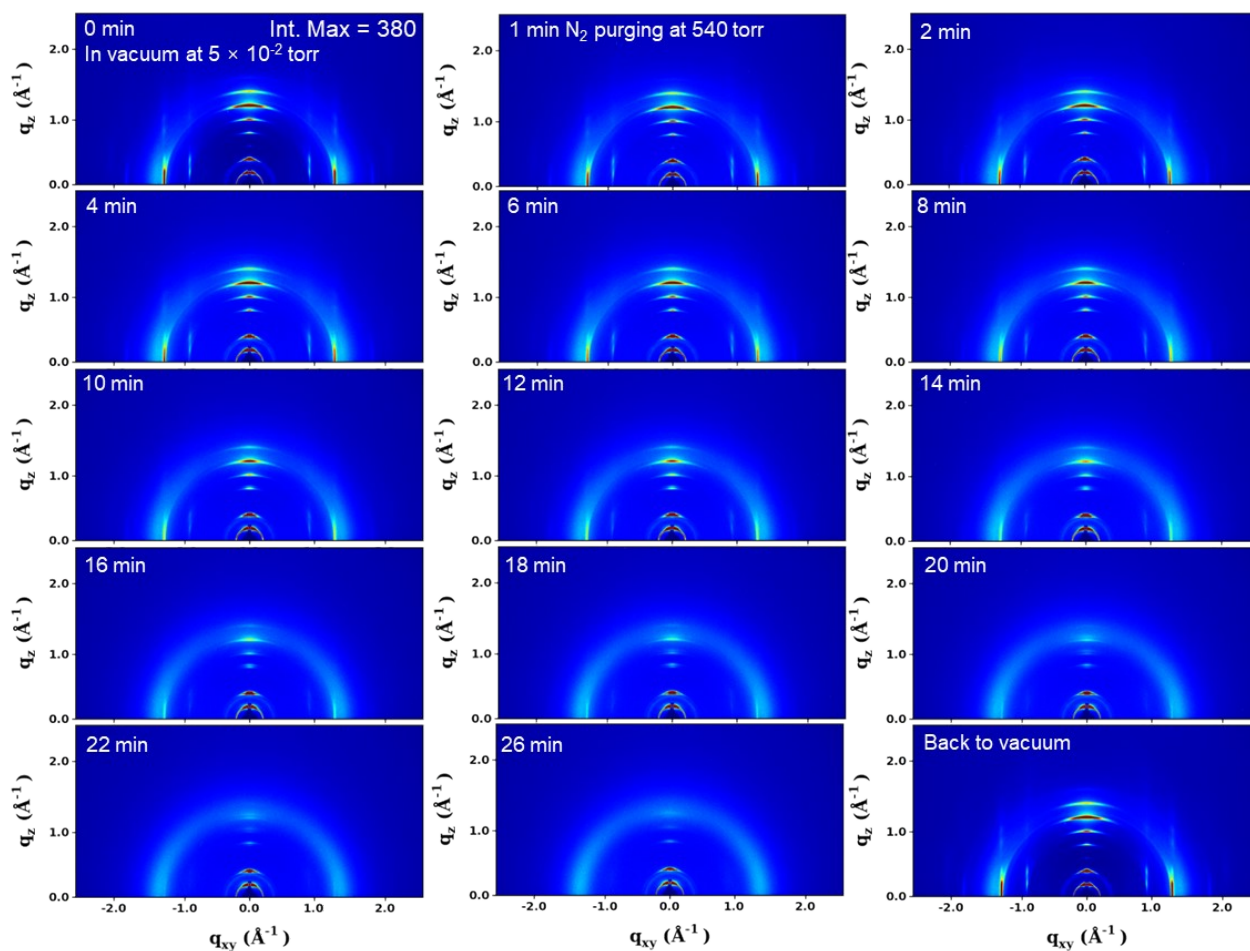

Figure S2. 2D GIWAXS patterns for the D7PC-P3HT film in vacuum, from 1 to 26 min after N<sub>2</sub> purging and in vacuum again.

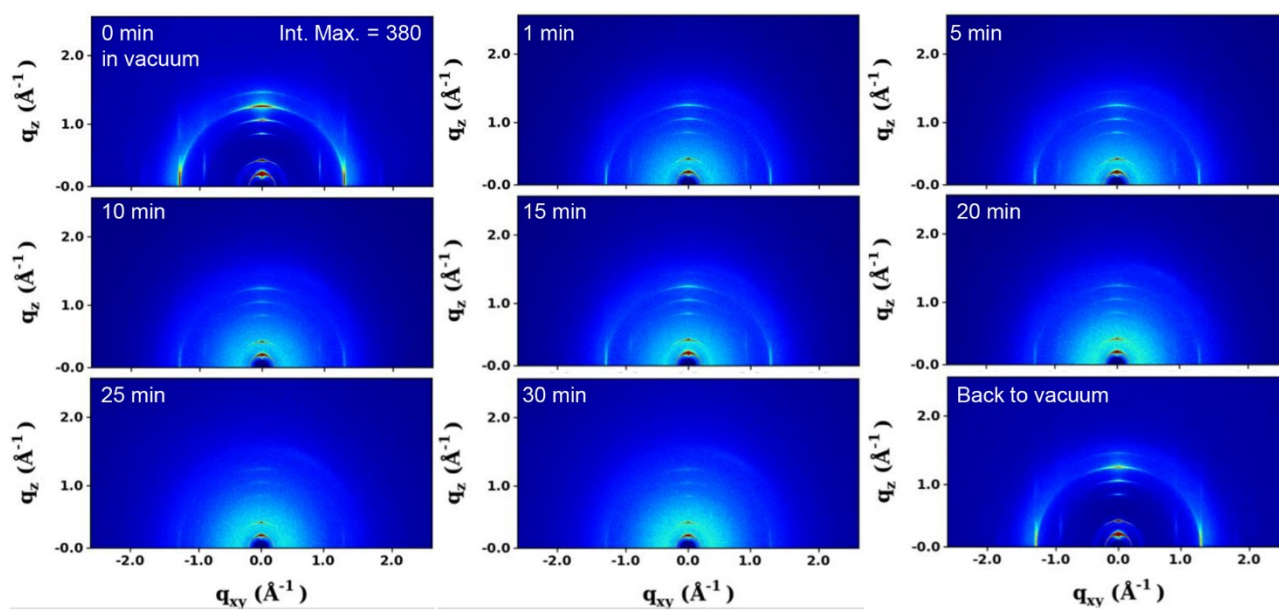

Figure S3. 2D GIWAXS patterns for the D7PC-P3HT film in vacuum, from 1 to 30 min after CO<sub>2</sub> purging and in vacuum again.
